# Supplementary material
Source: Springer Nature journal article supplement (https://www.springermedizin.de/resource/supplementary/13584_2013_66_MOESM3_ESM.pdf/9676892)

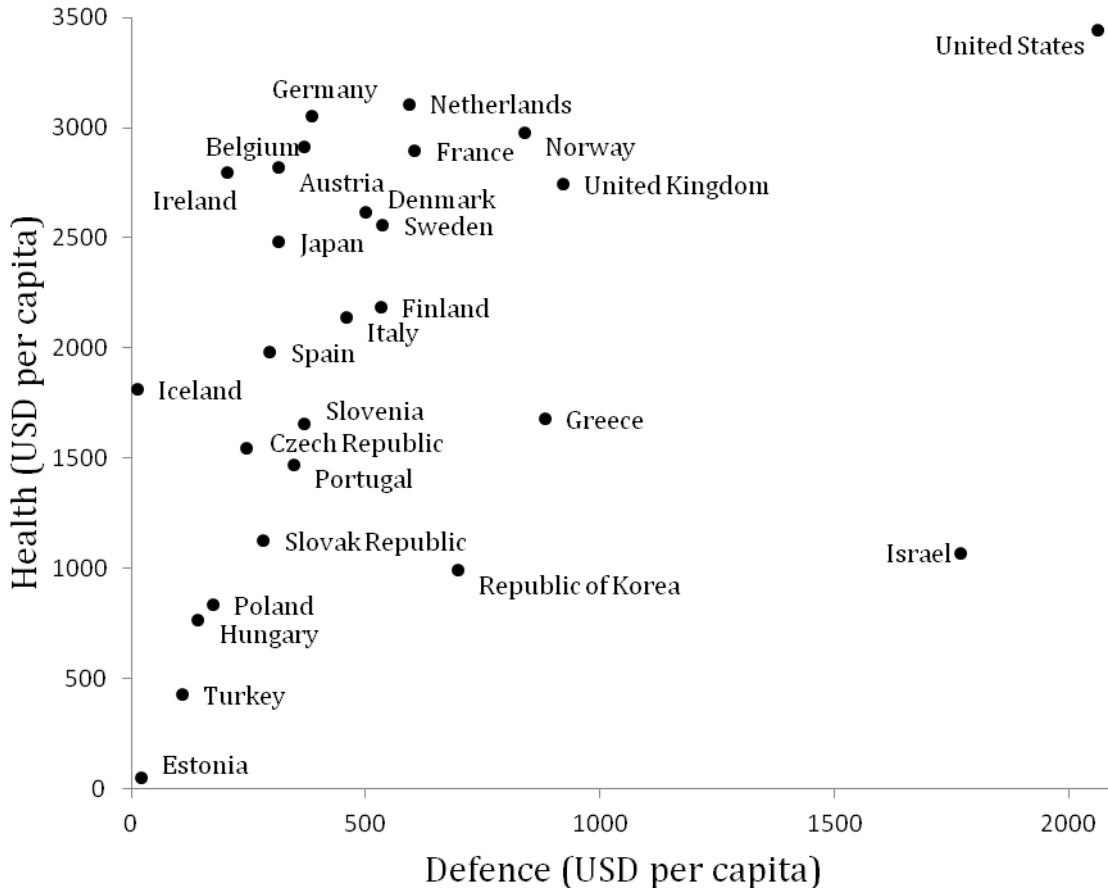

Supplement: MOESM3 [file 9676892]
